# Supplementary material for: Warming effect on nitrogen fixation in Mediterranean macrophyte sediments
Source: Copernicus journal article supplement (doi:10.5194/bg-16-167-2019), 2019-01-17
Supplement: Supplementary file 1 [file bg-16-167-2019-supplement.zip]

Archive with 3 entries (3 files):
- bg-16-167-2019-supplement-title-page.pdf
- Table S3.xlsx
- Garcias-Bonet et al-Supplementary_reviewed_final.pdf
