# Supplementary material for: Warming effect on nitrogen fixation in Mediterranean macrophyte sediments
Source: Copernicus journal article supplement (doi:10.5194/bg-16-167-2019), 2019-01-17
Supplement: Supplementary file 1 [file bg-16-167-2019-supplement.zip › bg-16-167-2019-supplement-title-page.pdf]

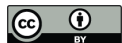

## *Supplement of*

# **Warming effect on nitrogen fixation in Mediterranean macrophyte sediments**

**Neus Garcias-Bonet et al.**

*Correspondence to:* Neus Garcias-Bonet ([neus.garciasbonet@kaust.edu.sa](mailto:neus.garciasbonet@kaust.edu.sa))

- [bg-16-167-2019-supplement-title-page.pdf](#)
- [Garcias-Bonet et al-Supplementary\\_reviewed\\_final.pdf](#)
- [Table S3.xlsx](#)

The copyright of individual parts of the supplement might differ from the CC BY 4.0 License.
