# Supplementary material for: Warming effect on nitrogen fixation in Mediterranean macrophyte sediments
Source: Copernicus journal article supplement (doi:10.5194/bg-16-167-2019), 2019-01-17
Supplement: Supplementary file 1 [file bg-16-167-2019-supplement.zip › Garcias-Bonet et al-Supplementary_reviewed_final.pdf]

## Supplementary material

**Fig. S1.** Summer *in situ* SST (from June 21<sup>st</sup> to September 22<sup>nd</sup>) from 2012 to 2017 at the study site. Solid line indicates average summer mean SST and dashed lines indicate the 25 and 75% percentiles. Average summer mean SST and percentiles do not include data from 2014 due to partial temporal coverage in temperature records. No data available for 2015.

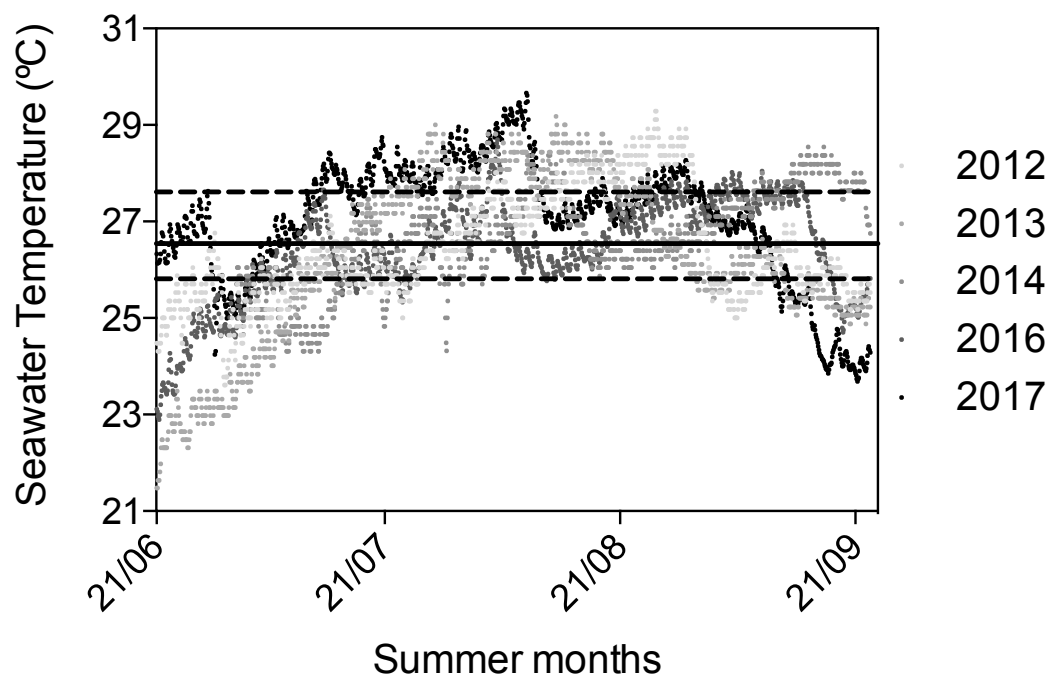

**Table S1.** Summary of *in situ* summer SST at the study site (Pollença Bay, Mallorca) from June 21<sup>st</sup> to September 22<sup>nd</sup> from 2012 to 2017, showing the mean  $\pm$  SEM, minimum (Min) and maximum (max), median, and 25 and 75% percentiles. Average calculated using data from 2012, 2013, 2016, and 2017 for which full summer records are available. Data not available for 2015 and partial temporal coverage available for 2014.

| Year                       | Summer Surface Seawater Temperature (SST) |                      |              |                |                |
|----------------------------|-------------------------------------------|----------------------|--------------|----------------|----------------|
|                            | Mean ( $\pm$ SEM)                         | Min - Max            | Median       | 25% percentile | 75% percentile |
| 2012                       | 26.44 $\pm$ 0.03                          | 23.61 – 29.29        | 26.23        | 25.70          | 27.28          |
| 2013                       | 26.29 $\pm$ 0.05                          | 21.48 – 29.18        | 26.28        | 25.23          | 27.98          |
| 2016                       | 26.39 $\pm$ 0.03                          | 22.92 – 28.69        | 26.43        | 25.82          | 27.24          |
| 2017                       | 27.03 $\pm$ 0.04                          | 23.69 – 29.67        | 27.21        | 26.50          | 27.92          |
| <b>Average 2012 – 2017</b> | <b>26.54 <math>\pm</math> 0.17</b>        | <b>22.92 – 29.21</b> | <b>26.54</b> | <b>25.81</b>   | <b>27.61</b>   |

**Table S2.** Experimental temperature set up used in the sediment incubations, indicating the five target temperatures and the actual mean ( $\pm$ SEM) temperature recorded in each incubation water bath during the 24h incubations every 10 minutes. The ranges (minimum – maximum values) and number of observations (N) are shown.

| Target temperature<br>(°C) | Incubation<br>temperature (°C)               |
|----------------------------|----------------------------------------------|
| 25 °C                      | 25.07 $\pm$ 0.01<br>(24.9 – 25.2)<br>N = 144 |
| 27 °C                      | 27.02 $\pm$ 0.01<br>(26.6 – 27.2)<br>N = 144 |
| 29 °C                      | 29.05 $\pm$ 0.01<br>(28.8 – 29.3)<br>N = 144 |
| 31 °C                      | 31.08 $\pm$ 0.01<br>(30.7 – 31.4)<br>N = 144 |
| 33 °C                      | 33.05 $\pm$ 0.01<br>(32.7 – 33.2)<br>N = 144 |
