# Supplementary material for: Warming effect on nitrogen fixation in Mediterranean macrophyte sediments
Source: Copernicus journal article supplement (doi:10.5194/bg-16-167-2019), 2019-01-17
Supplement: Supplementary file 1 [file bg-16-167-2019-supplement.zip › Table S3.xlsx]

## Sheet: Sheet1
Sample ID	Sediment type 1	Sediment type 2	Incubation temperature (C)	N2 fixation rates (nmol N / gDW h)	N2 fixation rates (mg N / m2 d)
P 25.1	Vegetated sediment	Posidonia oceanica	25	0.0685	1.588
P 25.2	Vegetated sediment	Posidonia oceanica	25	0.4896	9.0808
P 25.3	Vegetated sediment	Posidonia oceanica	25	0.0569	1.0664
P 27.1	Vegetated sediment	Posidonia oceanica	27	0.1241	2.1115
P 27.2	Vegetated sediment	Posidonia oceanica	27	0.1068	1.9541
P 27.3	Vegetated sediment	Posidonia oceanica	27	0.0665	1.3307
P 29.1	Vegetated sediment	Posidonia oceanica	29	0.182	2.9011
P 29.2	Vegetated sediment	Posidonia oceanica	29	0.1417	1.863
P 29.3	Vegetated sediment	Posidonia oceanica	29	0.091	1.9939
P 31.1	Vegetated sediment	Posidonia oceanica	31	0.7851	11.0615
P 31.2	Vegetated sediment	Posidonia oceanica	31	0.1524	1.4996
P 31.3	Vegetated sediment	Posidonia oceanica	31	0.5728	12.5469
P 33.1	Vegetated sediment	Posidonia oceanica	33	0.1046	2.2733
P 33.2	Vegetated sediment	Posidonia oceanica	33	0.1128	2.1681
P 33.3	Vegetated sediment	Posidonia oceanica	33	0.0944	1.7401
CN.25.1.	Vegetated sediment	Cymodocea nodosa	25	0.1767	5.0838
CN.25.2.	Vegetated sediment	Cymodocea nodosa	25	0.0547	1.9616
CN.25.3.	Vegetated sediment	Cymodocea nodosa	25	0.0771	2.8396
CN.27.1.	Vegetated sediment	Cymodocea nodosa	27	0.1056	3.4011
CN.27.2.	Vegetated sediment	Cymodocea nodosa	27	0.1834	6.7673
CN.27.3.	Vegetated sediment	Cymodocea nodosa	27	0.0914	3.112
CN.29.1.	Vegetated sediment	Cymodocea nodosa	29	0.1011	2.5275
CN.29.2.	Vegetated sediment	Cymodocea nodosa	29	0.1017	3.2464
CN.29.3.	Vegetated sediment	Cymodocea nodosa	29	0.1424	4.1651
CN.31.1.	Vegetated sediment	Cymodocea nodosa	31	0.1017	4.2296
CN.31.2.	Vegetated sediment	Cymodocea nodosa	31	0.1191	4.1845
CN.31.3.	Vegetated sediment	Cymodocea nodosa	31	0.6786	20.2391
CN.33.1.	Vegetated sediment	Cymodocea nodosa	33	0.0805	3.142
CN.33.2.	Vegetated sediment	Cymodocea nodosa	33	0.0979	3.6504
CN.33.3.	Vegetated sediment	Cymodocea nodosa	33	0.1018	3.3852
CP.25.1.	Vegetated sediment	Caulerpa prolifera	25	0.1477	2.4304
CP.25.2.	Vegetated sediment	Caulerpa prolifera	25	0.1073	1.7522
CP.25.3.	Vegetated sediment	Caulerpa prolifera	25	0.1391	2.0272
CP.27.1.	Vegetated sediment	Caulerpa prolifera	27	0.2071	3.7036
CP.27.2.	Vegetated sediment	Caulerpa prolifera	27	0.1868	2.8353
CP.27.3.	Vegetated sediment	Caulerpa prolifera	27	0.244	3.5577
CP.29.1.	Vegetated sediment	Caulerpa prolifera	29	0.8951	9.7278
CP.29.2.	Vegetated sediment	Caulerpa prolifera	29	0.2274	3.3924
CP.29.3.	Vegetated sediment	Caulerpa prolifera	29	0.2677	4.2191
CP.31.1.	Vegetated sediment	Caulerpa prolifera	31	0.2002	2.662
CP.31.2.	Vegetated sediment	Caulerpa prolifera	31	0.135	2.1837
CP.31.3.	Vegetated sediment	Caulerpa prolifera	31	0.0959	1.761
CP.33.1.	Vegetated sediment	Caulerpa prolifera	33	0.133	1.7681
CP.33.2.	Vegetated sediment	Caulerpa prolifera	33	0.1149	2.1474
CP.33.3.	Vegetated sediment	Caulerpa prolifera	33	0.1478	2.1996
S.25.1.	Bare sediment	Bare sediment	25	0.015	0.461
S.25.2.	Bare sediment	Bare sediment	25	0.0141	0.5099
S.25.3.	Bare sediment	Bare sediment	25	0.0163	0.5273
S.27.1.	Bare sediment	Bare sediment	27	0.0473	1.4617
S.27.2.	Bare sediment	Bare sediment	27	0.0617	2.2787
S.27.3.	Bare sediment	Bare sediment	27	0.0538	1.6085
S.29.1.	Bare sediment	Bare sediment	29	0.0882	2.9463
S.29.2.	Bare sediment	Bare sediment	29	0.0804	2.6262
S.29.3.	Bare sediment	Bare sediment	29	0.0639	2.1328
S.31.1.	Bare sediment	Bare sediment	31	0.0611	1.8013
S.31.2.	Bare sediment	Bare sediment	31	0.0516	1.8172
S.31.3.	Bare sediment	Bare sediment	31	0.0549	1.7597
S.33.1.	Bare sediment	Bare sediment	33	0.0837	2.3654
S.33.2.	Bare sediment	Bare sediment	33	0.077	2.3459
S.33.3.	Bare sediment	Bare sediment	33	0.0582	1.9065
